# Supplementary material for: Wastewater Surveillance for Poliovirus in Selected Jurisdictions, United States, 2022–2023
Source: PubMed Central journal article supplement (PMC11521156; doi:10.3201/eid3011.240771), 2024-11
Supplement: 24-0771-Techapp-s1.pdf [file 24-0771-Techapp-s1.pdf]

Article DOI: <https://doi.org/10.3201/eid3011.240771>

*EID cannot ensure accessibility for supplementary materials supplied by authors. Readers who have difficulty accessing supplementary content should contact the authors for assistance.*

# Wastewater Surveillance for Poliovirus in Selected Jurisdictions, United States, 2022–2023

## Appendix

**Appendix Table.** The total number of counties, sewersheds, estimated coverage of the sewersheds and the estimated number of people represented, dates of sample collection, and total number of samples in participating jurisdictions, March 5, 2022–December 31, 2023\*

| Jurisdiction | County/Planning Region(s)†                  | No. sampling sites | County Population (April 2020) | Estimated percentage of county population covered by sewershed(s) | Estimated number of people represented by the sewershed(s) | Date range of sample collection | Total no. samples tested |
|--------------|---------------------------------------------|--------------------|--------------------------------|-------------------------------------------------------------------|------------------------------------------------------------|---------------------------------|--------------------------|
| Chicago      | Cook                                        | 4                  | 5275555                        | 88.0%                                                             | 4642488                                                    | 3/12/2023–7/2/2023              | 36                       |
| Connecticut  | Connecticut Metropolitan/Greater Bridgeport | 2                  | 325774                         | 46.7%                                                             | 152265                                                     | 6/13/2022–8/3/2022              | 10                       |
| Connecticut  | Naugatuck Valley                            | 2                  | 450435                         | 29.2%                                                             | 131500                                                     | 5/3/2022–8/3/2022               | 24                       |
| Connecticut  | South Central Regional                      | 1                  | 570455                         | 40.0%                                                             | 228000                                                     | 5/10/2022–8/2/2022              | 9                        |
| Connecticut  | Southeastern Connecticut                    | 2                  | 280428                         | 22.1%                                                             | 62000                                                      | 5/24/2022–8/3/2022              | 15                       |
| Connecticut  | Western Connecticut                         | 3                  | 620519                         | 41.9%                                                             | 260000                                                     | 5/8/2022–8/3/2022               | 29                       |
| Illinois     | Kankakee                                    | 1                  | 107510                         | 52.4%                                                             | 56324                                                      | 4/5/2022–4/3/2023               | 22                       |
| Illinois     | Rock Island                                 | 2                  | 144667                         | 47.7%                                                             | 68963                                                      | 7/12/2022–4/5/2023              | 42                       |
| Illinois     | St. Clair                                   | 4                  | 257412                         | 66.1%                                                             | 170201                                                     | 4/5/2022–4/4/2023               | 73                       |
| Michigan     | Oakland                                     | 2                  | 1274402                        | 20%–25%                                                           | 254880–318600                                              | 6/12/2023–11/29/2023            | 44                       |
| New Jersey   | Bergen, Essex, Hudson, Passaic              | 1                  | 3068423                        | 21.7%, 59.8%, 68.3%, 76.4%                                        | 1620409                                                    | 5/16/2022–8/5/2022              | 10                       |

| Jurisdiction   | County/Planning Region(s)† | No. sampling sites | County Population (April 2020) | Estimated percentage of county population covered by sewershed(s) | Estimated number of people represented by the sewershed(s) | Date range of sample collection | Total no. samples tested |
|----------------|----------------------------|--------------------|--------------------------------|-------------------------------------------------------------------|------------------------------------------------------------|---------------------------------|--------------------------|
| New Jersey     | Essex, Union               | 1                  | 1438131                        | 28.3%, 43.9%                                                      | 496638                                                     | 7/18/2022–8/3/2022              | 4                        |
| New Jersey     | Hudson                     | 1                  | 724858                         | 14.8%                                                             | 107113                                                     | 8/2/2022                        | 1                        |
| New Jersey     | Middlesex, Somerset, Union | 1                  | 1783918                        | 86.3%, 33.3%, 12.5%                                               | 932171                                                     | 5/11/2022–8/3/2022              | 14                       |
| New Jersey     | Passaic                    | 1                  | 525054                         | 10.4%                                                             | 54642                                                      | 7/12/2022–8/2/2022              | 3                        |
| New York City  | Bronx                      | 1                  | 1472653                        | 52.2%                                                             | 769120                                                     | 7/5/2022–12/26/2023             | 123                      |
| New York City  | Bronx, New York            | 1                  | 3166903                        | 46.2%, 28.9%                                                      | 1197129                                                    | 7/5/2022–12/26/2023             | 124                      |
| New York City  | Kings                      | 4                  | 2736119                        | 76.1%                                                             | 2082806                                                    | 5/31/2022–12/26/2023            | 520                      |
| New York City  | Kings, New York, Queens    | 3                  | 6835794                        | 22.4%, 31.9%, 5.9%                                                | 1197476                                                    | 5/31/2022–12/26/2023            | 229                      |
| New York City  | New York                   | 1                  | 1694250                        | 38.7%                                                             | 655795                                                     | 7/5/2022–12/26/2023             | 124                      |
| New York City  | Queens                     | 4                  | 2405425                        | 91.4%                                                             | 2199116                                                    | 5/31/2022–12/26/2023            | 504                      |
| New York City  | Richmond                   | 2                  | 495752                         | 96.2%                                                             | 477051                                                     | 5/31/2022–12/26/2023            | 264                      |
| New York State | Albany                     | 2                  | 314851                         | 31.6%                                                             | 99493                                                      | 07/27/2022 - 10/17/2022         | 26                       |
| New York State | Allegany                   | 2                  | 46450                          | 11.4%                                                             | 5295                                                       | 06/07/2022 - 10/19/2022         | 22                       |
| New York State | Broome                     | 2                  | 198683                         | 58.3%                                                             | 115832                                                     | 08/10/2022 - 11/01/2022         | 13                       |
| New York State | Cattaraugus                | 1                  | 77034                          | 23.1%                                                             | 17795                                                      | 06/06/2022 - 10/25/2022         | 22                       |
| New York State | Cayuga                     | 1                  | 76253                          | 41.7%                                                             | 31798                                                      | 07/26/2022 - 10/18/2022         | 11                       |
| New York State | Chautauqua                 | 2                  | 127657                         | 35.3%                                                             | 45063                                                      | 06/07/2022 - 10/25/2022         | 39                       |
| New York State | Chemung                    | 1                  | 84142                          | 45.2%                                                             | 38032                                                      | 11/02/2022 - 11/02/2022         | 1                        |
| New York State | Chenango                   | 1                  | 47220                          | 14.3%                                                             | 6752                                                       | 07/27/2022 - 10/19/2022         | 12                       |
| New York State | Clinton                    | 2                  | 79838                          | 27.5%                                                             | 21955                                                      | 08/02/2022 - 10/14/2022         | 18                       |
| New York State | Columbia                   | 1                  | 61560                          | 10.4%                                                             | 6402                                                       | 07/26/2022 - 10/18/2022         | 11                       |
| New York State | Cortland                   | 1                  | 46800                          | 57.6%                                                             | 26957                                                      | 07/26/2022 - 10/18/2022         | 10                       |
| New York State | Delaware                   | 1                  | 44311                          | 8.1%                                                              | 3589                                                       | 07/27/2022 - 10/19/2022         | 13                       |

| Jurisdiction   | County/Planning Region(s)† | No. sampling sites | County Population (April 2020) | Estimated percentage of county population covered by sewershed(s) | Estimated number of people represented by the sewershed(s) | Date range of sample collection | Total no. samples tested |
|----------------|----------------------------|--------------------|--------------------------------|-------------------------------------------------------------------|------------------------------------------------------------|---------------------------------|--------------------------|
| New York State | Dutchess                   | 1                  | 297021                         | 12.9%                                                             | 38316                                                      | 07/27/2022 - 10/19/2022         | 21                       |
| New York State | Erie                       | 6                  | 954231                         | 82.4%                                                             | 786286                                                     | 06/02/2022 - 10/27/2022         | 283                      |
| New York State | Essex                      | 2                  | 37374                          | 25.0%                                                             | 9344                                                       | 07/25/2022 - 10/19/2022         | 27                       |
| New York State | Franklin                   | 2                  | 47573                          | 25.4%                                                             | 12084                                                      | 07/26/2022 - 10/19/2022         | 28                       |
| New York State | Fulton                     | 1                  | 53333                          | 43.8%                                                             | 23360                                                      | 07/25/2022 - 10/17/2022         | 13                       |
| New York State | Greene                     | 1                  | 47932                          | 10.2%                                                             | 4889                                                       | 08/18/2022 - 10/20/2022         | 7                        |
| New York State | Hamilton                   | 1                  | 5105                           | 2.2%                                                              | 112                                                        | 08/03/2022 - 10/21/2022         | 11                       |
| New York State | Herkimer                   | 2                  | 60144                          | 35.7%                                                             | 21471                                                      | 07/25/2022 - 10/17/2022         | 12                       |
| New York State | Jefferson                  | 3                  | 116711                         | 46.2%                                                             | 53920                                                      | 09/13/2022 - 12/14/2022         | 7                        |
| New York State | Lewis                      | 1                  | 26587                          | 14.9%                                                             | 3961                                                       | 08/03/2022 - 11/09/2022         | 11                       |
| New York State | Livingston                 | 2                  | 61840                          | 33.0%                                                             | 20407                                                      | 08/09/2022 - 10/18/2022         | 19                       |
| New York State | Madison                    | 5                  | 68017                          | 34.6%                                                             | 23534                                                      | 08/11/2022 - 10/20/2022         | 39                       |
| New York State | Monroe                     | 2                  | 759430                         | 26.1%                                                             | 198211                                                     | 08/08/2022 - 09/27/2022         | 2                        |
| New York State | Montgomery                 | 1                  | 49527                          | 39.7%                                                             | 19662                                                      | 07/27/2022 - 09/28/2022         | 10                       |
| New York State | Nassau                     | 5                  | 1395767                        | 85.0%                                                             | 1186402                                                    | 03/09/2022 - 12/27/2023         | 496                      |
| New York State | Niagara                    | 1                  | 212666                         | 22.7%                                                             | 48275                                                      | 06/20/2022 - 10/29/2022         | 18                       |
| New York State | Oneida                     | 2                  | 232113                         | 50.2%                                                             | 116521                                                     | 07/26/2022 - 11/03/2022         | 38                       |
| New York State | Onondaga                   | 6                  | 476523                         | 85.0%                                                             | 405045                                                     | 07/24/2022 - 11/06/2022         | 25                       |
| New York State | Ontario                    | 1                  | 112485                         | 15.9%                                                             | 17885                                                      | 08/09/2022 - 10/18/2022         | 7                        |
| New York State | Orange                     | 9                  | 401315                         | 46.0%                                                             | 184605                                                     | 03/09/2022 - 12/29/2023         | 1120                     |
| New York State | Oswego                     | 1                  | 117528                         | 12.1%                                                             | 14221                                                      | 07/27/2022 - 10/19/2022         | 11                       |
| New York State | Otsego                     | 1                  | 58528                          | 33.1%                                                             | 19373                                                      | 07/27/2022 - 10/20/2022         | 13                       |
| New York State | Putnam                     | 2                  | 97678                          | 6.4%                                                              | 6251                                                       | 03/16/2022 - 12/27/2023         | 98                       |

| Jurisdiction   | County/Planning Region(s)† | No. sampling sites | County Population (April 2020) | Estimated percentage of county population covered by sewershed(s) | Estimated number of people represented by the sewershed(s) | Date range of sample collection | Total no. samples tested |
|----------------|----------------------------|--------------------|--------------------------------|-------------------------------------------------------------------|------------------------------------------------------------|---------------------------------|--------------------------|
| New York State | Rensselaer                 | 1                  | 161124                         | 49.5%                                                             | 79756                                                      | 07/27/2022 - 10/19/2022         | 12                       |
| New York State | Rockland                   | 6                  | 338337                         | 96.1%                                                             | 325142                                                     | 03/09/2022 - 12/28/2023         | 597                      |
| New York State | Saratoga                   | 1                  | 235502                         | 64.7%                                                             | 152370                                                     | 07/27/2022 - 10/20/2022         | 13                       |
| New York State | Schenectady                | 1                  | 158052                         | 49.6%                                                             | 78394                                                      | 07/26/2022 - 11/17/2022         | 25                       |
| New York State | Schoharie                  | 1                  | 29718                          | 17.9%                                                             | 5320                                                       | 07/27/2022 - 10/19/2022         | 14                       |
| New York State | Schuyler                   | 1                  | 17894                          | 20.4%                                                             | 3650                                                       | 08/04/2022 - 10/20/2022         | 9                        |
| New York State | Seneca                     | 1                  | 33816                          | 20.6%                                                             | 6966                                                       | 07/27/2022 - 10/20/2022         | 8                        |
| New York State | St. Lawrence               | 1                  | 107733                         | 9.9%                                                              | 10666                                                      | 10/05/2022 - 10/05/2022         | 1                        |
| New York State | Steuben                    | 4                  | 93571                          | 24.7%                                                             | 23112                                                      | 07/26/2022 - 10/20/2022         | 82                       |
| New York State | Suffolk                    | 8                  | 1525894                        | 21.9%                                                             | 334171                                                     | 08/15/2022 - 12/27/2023         | 285                      |
| New York State | Sullivan                   | 6                  | 78613                          | 23.1%                                                             | 18160                                                      | 07/21/2022 - 12/28/2023         | 228                      |
| New York State | Tioga                      | 1                  | 48452                          | 7.7%                                                              | 3731                                                       | 07/27/2022 - 10/19/2022         | 11                       |
| New York State | Tompkins                   | 1                  | 105737                         | 53.9%                                                             | 56992                                                      | 08/31/2022 - 09/07/2022         | 2                        |
| New York State | Ulster                     | 3                  | 181841                         | 22.5%                                                             | 40914                                                      | 07/27/2022 - 12/27/2023         | 219                      |
| New York State | Warren                     | 1                  | 65737                          | 35.7%                                                             | 23468                                                      | 07/25/2022 - 10/17/2022         | 12                       |
| New York State | Washington                 | 1                  | 61297                          | 20.0%                                                             | 12259                                                      | 07/27/2022 - 10/20/2022         | 11                       |
| New York State | Wayne                      | 1                  | 91286                          | 9.8%                                                              | 8946                                                       | 07/26/2022 - 10/18/2022         | 9                        |
| New York State | Westchester                | 7                  | 1004469                        | 83.9%                                                             | 842749                                                     | 08/28/2022 - 12/31/2023         | 942                      |
| New York State | Wyoming                    | 1                  | 40544                          | 8.5%                                                              | 3446                                                       | 07/26/2022 - 10/18/2022         | 12                       |
| New York State | Yates                      | 1                  | 24769                          | 21.6%                                                             | 5350                                                       | 07/27/2022 - 10/19/2022         | 11                       |

\*Note: Population estimates and percent coverage were reported by the jurisdiction or from CDC NWSS (NJ, CT) based on April 2020 U.S. census data.

†Some sewersheds covered multiple counties/planning region(s) so there might be multiple counties/planning region(s) represented and the estimated percentage of the county population covered by the sewershed(s) is separated by county/planning region.
